# Supplementary material for: First-Principles Study of Amorphous Al2O3 ALD Coating in Li-S Battery Electrode Design
Source: MDPI journal article supplement (doi:10.3390/en15010390), 2022-01-05
Supplement: s1 [file s1]

Article

# First-Principles Study of Amorphous $\text{Al}_2\text{O}_3$ ALD Coating in Li-S Battery Electrode Design

Jake A. Klorman <sup>1</sup>, Qing Guo <sup>2</sup> and Kah Chun Lau <sup>1,\*</sup>

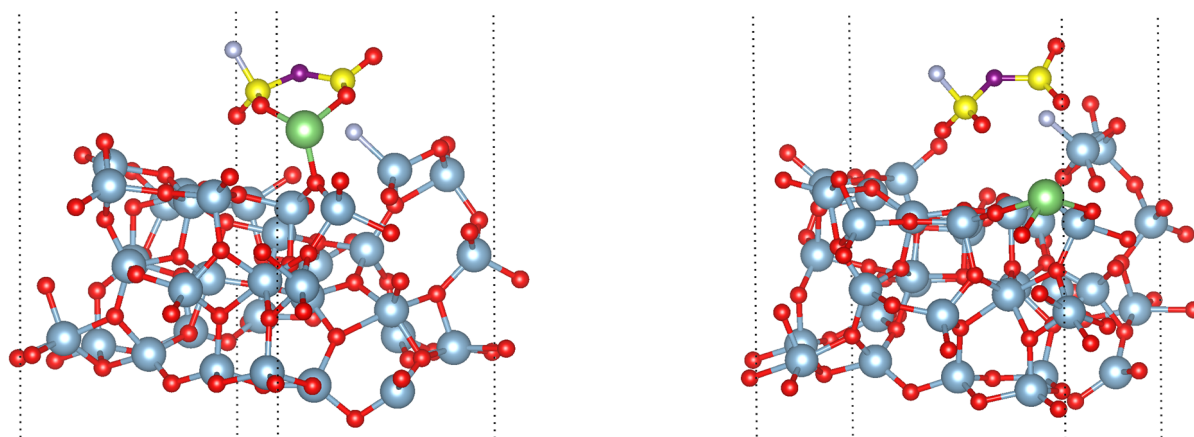

**Figure S1.** Two lowest energy configurations for LiFSI during adsorption on  $\text{Al}_2\text{O}_3$  ALD surface. (left) The  $\text{Li}^+$  is associated with FSI anion during the adsorption ( $E_a \sim 2.24$  eV), whereas (right) is the optimized geometry where the  $\text{Li}^+$  is dissociated from FSI anion during the adsorption ( $E_a \sim 2.25$  eV).

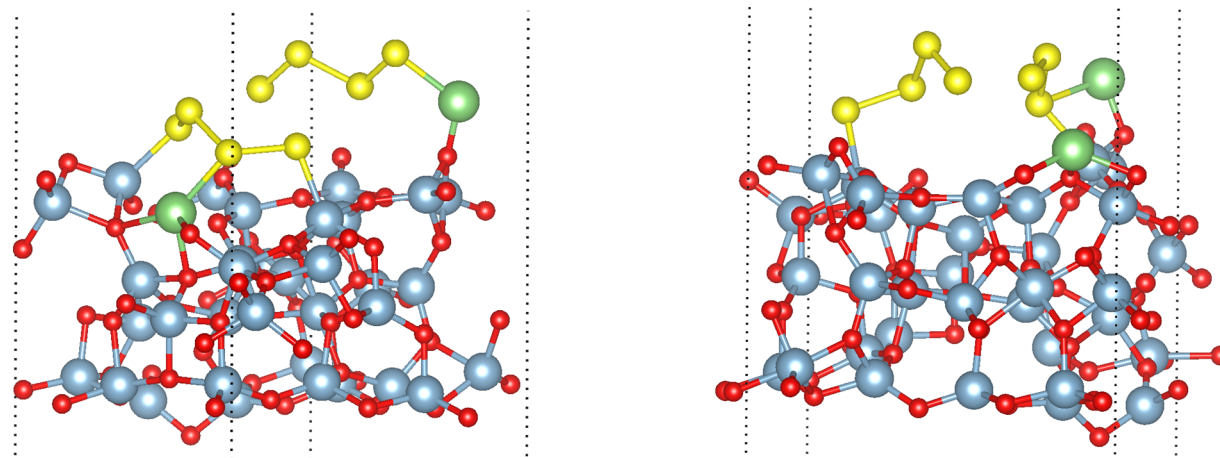

**Figure S2.** The fragmented  $\text{Li}_2\text{S}_8$  (with  $E_a \sim 3.55$  eV, left) and  $\text{Li}_2\text{S}_7$  (with  $E_a \sim 4.03$  eV, right) during the chemisorption on  $\text{Al}_2\text{O}_3$  ALD surfaces.

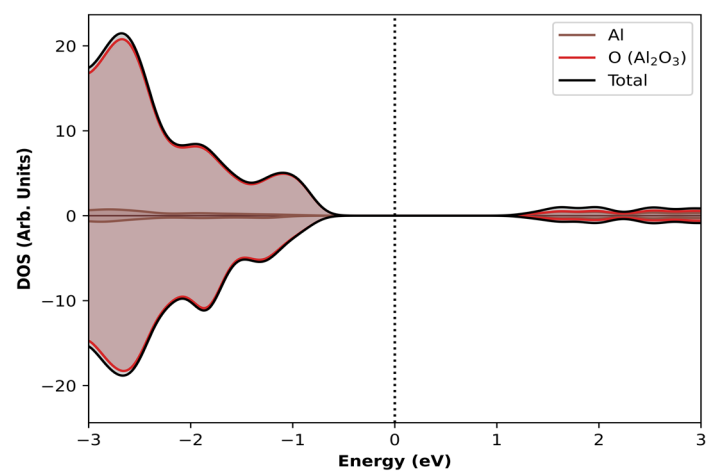

**Figure S3.** The electronic density of states (DOS) of pristine Al<sub>2</sub>O<sub>3</sub> ALD surfaces with band gap ~ 1.60 eV. The black dot line is the Fermi level.
